# Supplementary material for: The Down-Regulation of Clusterin Expression Enhances the αSynuclein Aggregation Process
Source: Int J Mol Sci. 2020 Sep 29;21(19):7181. doi: 10.3390/ijms21197181 (PMC7582711; doi:10.3390/ijms21197181)
Supplement: Supplementary file 1 [file ijms-21-07181-s001.pdf]

# **The Down-regulation of Clusterin Expression Enhances the $\alpha$ Synuclein Aggregation Process**

Chiara Lenzi, Ileana Ramazzina\*, Isabella Russo, Alice Filippini, Saverio Bettuzzi &  
Federica Rizzi

## **List of the material included:**

**Supplementary Figure 1. Morphological and cell proliferation analyses.**

**Supplementary Figure 2. MG132 cytotoxicity analysis.**

**Supplementary Figure 3. Densitometric analysis of CLU protein levels in SH-Syn<sub>T</sub>.**

**Supplementary Figure 4. Localization of CLU and  $\alpha$ Syn in SH-Syn<sub>T</sub>.**

**Supplementary Figure 5. CLU down-regulation in SH-Syn and SH-Syn<sub>T</sub>.**

**Supplementary Figure 6. The experiments timelines.**

**Table S1. Sequences of the primers used in qPCR analysis.**

**Table S2. List of antibodies used.**

**References.**

**A**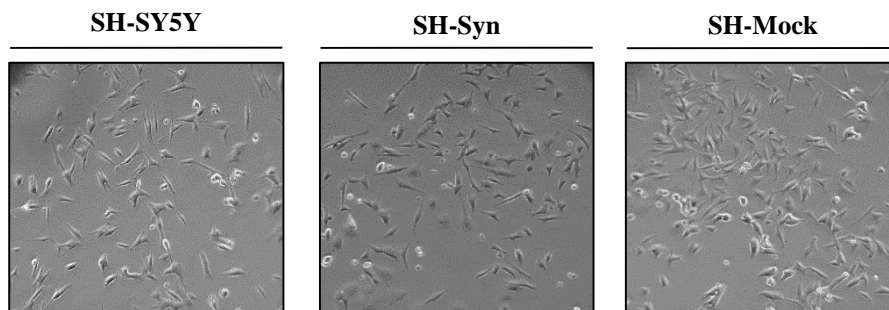**B**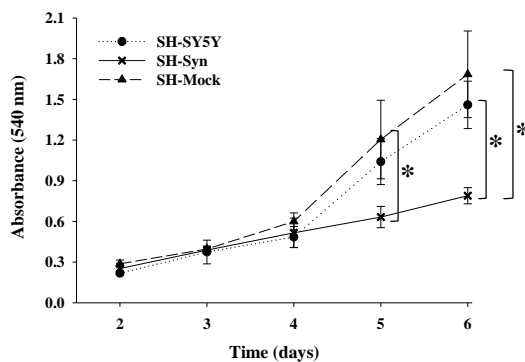

**Supplementary Figure 1. Morphological and cell proliferation analyses.** (A) SH-SY5Y (left panel), SH-Syn (middle panel) and SH-Mock (right panel) cells morphology in phase contrast microscopy. (B) Proliferation rates of SH-SY5Y, SH-Syn and SH-Mock by crystal violet assay. Data are presented as the mean  $\pm$  SD from three independent experiments, each performed in triplicate. Data were analyzed by a One-way ANOVA test followed by a Holm-Sidak multiple comparison test to compare cell lines (\* $p < 0.05$ ).

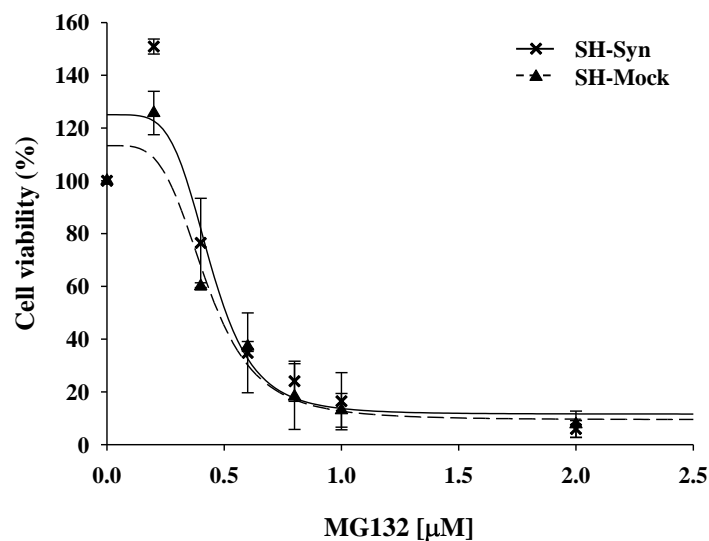

**Supplementary Figure 2. MG132 cytotoxicity analysis.** SH-Syn and SH-Mock cell viability analyzed by WST-1 assay after 48 hours of MG132 treatment. Dose-response curves were generated and  $IC_{50}$  were determined by a non-linear regression analysis (four parameter logistic curve). Data are presented as the mean  $\pm$  SD from three independent experiments, each performed in triplicate.

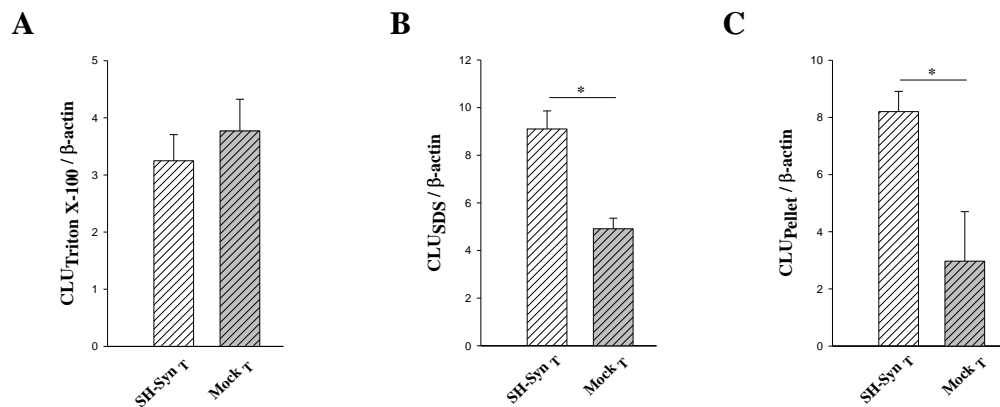

**Supplementary Figure 3. Densitometric analysis of CLU protein levels in SH-Syn<sub>T</sub>.** CLU levels normalized to  $\beta$ -actin in the (A) 1% Triton X-100 soluble fraction, (B) 2% SDS soluble fraction and (C) pellet. Data are presented as the mean  $\pm$  SD from three independent experiments (\* $p < 0.05$ ).

**A**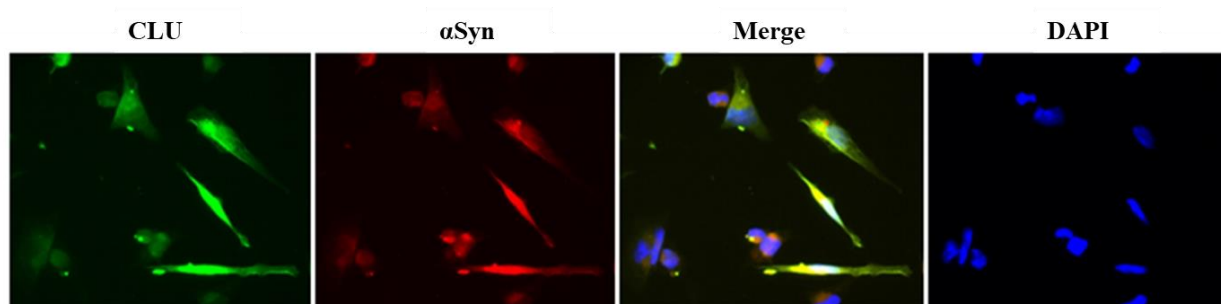**B**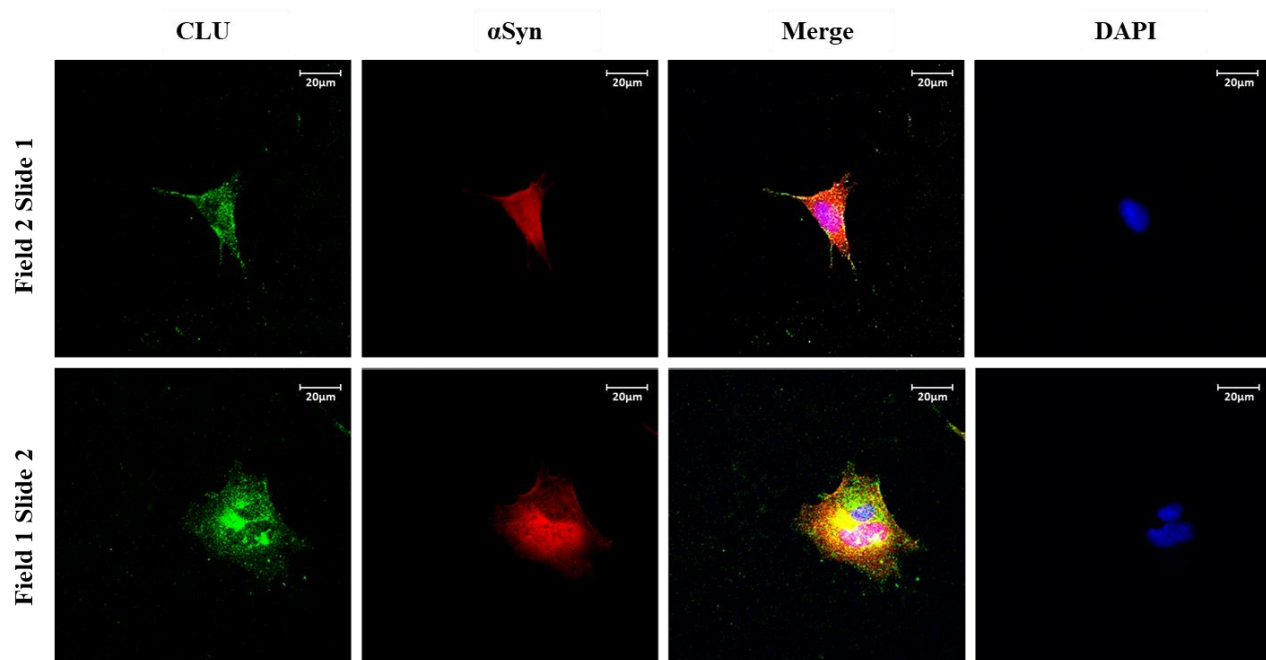

**Supplementary Figure 4. Localization of CLU and  $\alpha$ Syn in SH-Syn<sub>T</sub>.** Representative images of intracellular localization of CLU (green fluorescence) and  $\alpha$ Syn (red fluorescence) in SH-Syn<sub>T</sub> acquired by (A) normal fluorescence microscopy (Magnification 20X) and (B) confocal microscopy (Magnification 40X). Cell nuclei were stained with DAPI (blue fluorescence).

**A**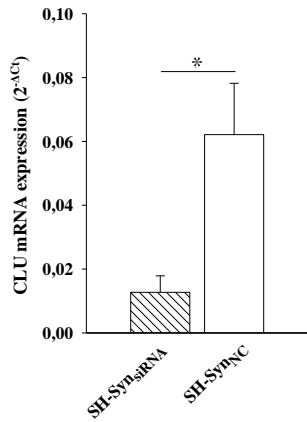**B**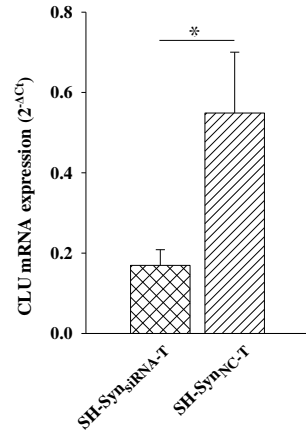

**Supplementary Figure 5. CLU down-regulation in SH-Syn and SH-Syn<sub>T</sub>.** (A) CLU mRNA quantification in SH-Syn<sub>siRNA</sub> and SH-Syn<sub>NC</sub>. Data are presented as the mean  $\pm$  SD from three independent experiments, each performed in duplicate. Data were analyzed by a Mann-Whitney Rank Sum Test (\* $p < 0.05$ ). (B) CLU mRNA quantification in SH-Syn<sub>siRNA-T</sub> and SH-Syn<sub>NC-T</sub>. Data are presented as the mean  $\pm$  SD from three independent experiments, each performed in duplicate. Data were analyzed by a Mann-Whitney Rank Sum Test (\* $p < 0.05$ ).

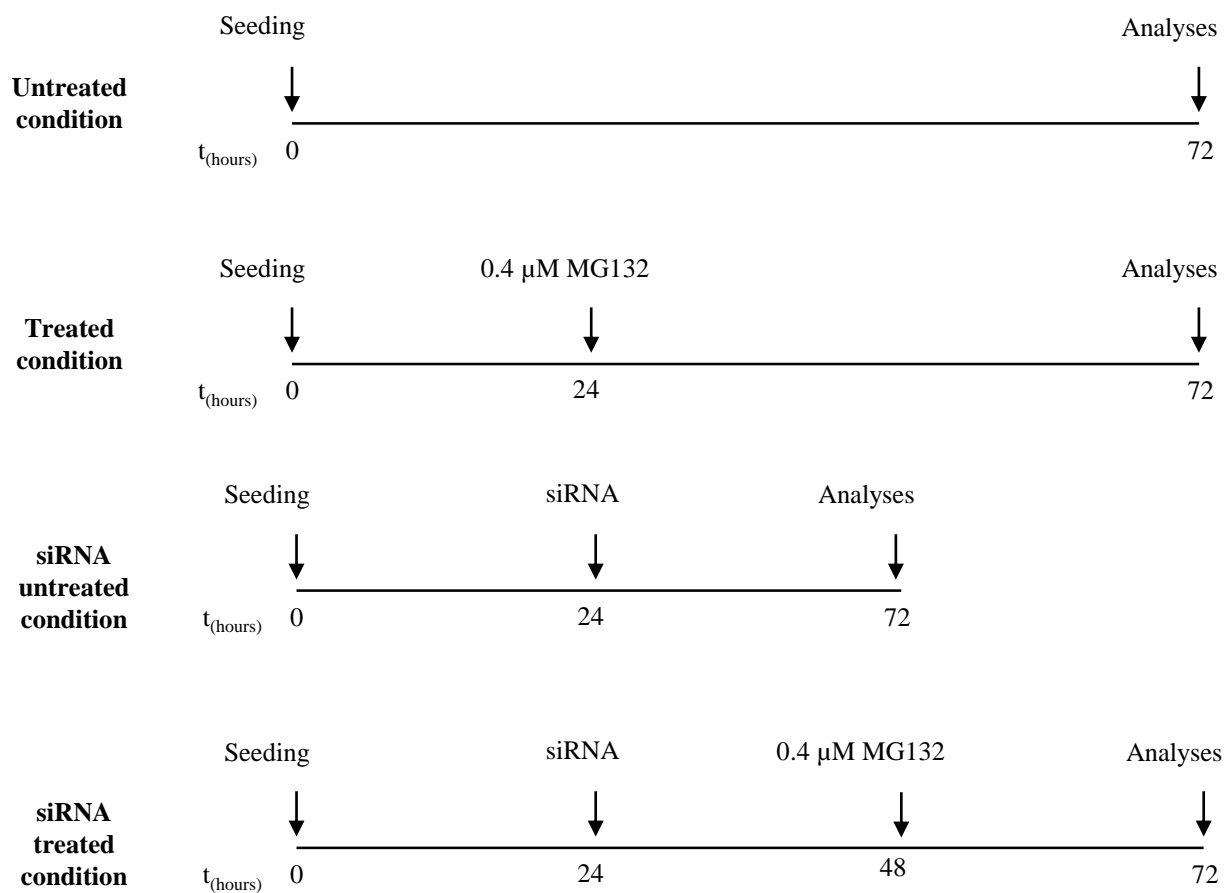

**Supplementary Figure 6. The experiments timelines.** Details of the experimental conditions and timelines of the analyses reported in the article.

**Table S1. Sequences of the primers used in qPCR analysis.**

| mRNA           | Primer Forward 5'→3'  | Primer Reverse 5'→3'     | T °C<br>annealing | Cycles |
|----------------|-----------------------|--------------------------|-------------------|--------|
| αSyn [1]       | CAACAGTGGCTGAGAAGACCA | CTCCTTCTTCATTCTTGCCCA    | 60                | 40     |
| CLU [2]        | TGATCCCATCACTGTGACGG  | GCTTTTTGCGGTATTCCTGC     | 60                | 40     |
| Hsp27 [3]      | AAGTTTCCTCCTCCCTGTCC  | CGGGCTAAGGCTTTACTTGG     | 60                | 40     |
| Hsp70 [3]      | GGAGGCGGAGAAGTACA     | GCTGATGATGGGGTTACA       | 60                | 40     |
| Hsp90 [3]      | GATAAACCCCTGACCATTCC  | AAGACAGGAGCGCAGTTTCATAAA | 60                | 40     |
| Bip [4]        | GCCGTCCTATGTCGCCTTC   | TTTGTTTGCCACCTCCAAT      | 58                | 40     |
| ATF4 [5]       | ATGACCGAAATGAGCTTCCTG | CTGGAGAACCCATGAGGTTTG    | 58                | 40     |
| CHOP [4]       | CTTCTCTGGCTTGGCTGACT  | TCCCTTGGTCTTCCTCCTCT     | 58                | 40     |
| XBP1-total [4] | CCTTGTA GTTGAGAACCAGG | GGAAGGGCATTGGAAGAACA     | 58                | 40     |
| XBP1-us [4]    | GCTGAGTCCGGCAGGTGC    | GGAAGGGCATTGGAAGAACA     | 58                | 40     |
| GAPDH [2]      | AACCTGCCAAATATGATGAC  | TTGAAGTCAGAGGAGACCAC     | 60                | 40     |

**Table S2. List of antibodies used.**

|                  | <b>Antibody</b>                                             | <b>Species</b> | <b>Technique and dilution</b>                |
|------------------|-------------------------------------------------------------|----------------|----------------------------------------------|
| <b>Primary</b>   | Anti- $\alpha$ Syn (Clone 42, BD Transduction Laboratories) | Mouse          | WB: 1:500 in Milk 5%<br>IF: 1:50 in BSA 3%   |
|                  | Anti-CLU $\alpha$ (SC-6420, Santa Cruz Biotechnology)       | Goat           | WB: 1:1.000 in Milk 5%<br>IF: 1:10 in BSA 3% |
|                  | Anti-CLU Human (AF2937, R&D System)                         | Goat           | IP: 25 $\mu$ g/mL                            |
|                  | Anti-Hsp27 (SC-13132, Santa Cruz Biotechnology)             | Mouse          | WB: 1:500 in Milk 5%                         |
|                  | Anti-Hsp70 ( ab181606, Abcam)                               | Rabbit         | WB: 1:2.000 in Milk 5%                       |
|                  | Anti-Hsp90 (ADI-SPA-830, Enzo Life Sciences)                | Mouse          | WB: 1:500 in Milk 5%                         |
|                  | Anti- $\beta$ actin (SC:81178, Santa Cruz Biotechnology)    | Mouse          | WB: 1:500 in Milk 5%                         |
| <b>Secondary</b> | Anti-Mouse IgG (A5906, Sigma-Aldrich)                       | Sheep          | WB: 1:5.000 in Milk 5%                       |
|                  | Anti-Goat IgG (A8919, Sigma-Aldrich)                        | Rabbit         | WB: 1:5.000 in Milk 5%                       |
|                  | Anti-Rabbit IgG (A0545, Sigma-Aldrich)                      | Goat           | WB: 1:200.000 in Milk 5%                     |
|                  | Anti-Goat IgG (Alexa Flour <sup>TM</sup> 488, Invitrogen)   | Rabbit         | IF: 1:300 in BSA 3%                          |
|                  | Anti-Mouse IgG (Alexa Flour <sup>TM</sup> 568, Invitrogen)  | Goat           | IF: 1:300 in BSA 3%                          |

WB: western blot assay; IF: immunofluorescence assay; IP: immunoprecipitation assay.

## REFERENCES

1. Asi, Y.T.; Simpson, J.E.; Heath, P.R.; Wharton, S.B.; Lees, A.J.; Revesz, T.; Houlden, H.; Holton, J.L. Alpha-synuclein mRNA expression in oligodendrocytes in MSA. *Glia* **2014**, *62*, 964–970, doi:10.1002/glia.22653.
2. Bonacini, M.; Coletta, M.; Ramazzina, I.; Naponelli, V.; Modernelli, A.; Davalli, P.; Bettuzzi, S.; Rizzi, F. Distinct promoters, subjected to epigenetic regulation, drive the expression of two clusterin mRNAs in prostate cancer cells. *Biochim. Biophys. Acta - Gene Regul. Mech.* **2015**, *1849*, doi:10.1016/j.bbagr.2014.11.003.
3. Kilpatrick, K.; Novoa, J.A.; Hancock, T.; Guerriero, C.J.; Wipf, P.; Brodsky, J.L.; Segatori, L. Chemical induction of Hsp70 reduces  $\alpha$ -synuclein aggregation in neuroglioma cells. *ACS Chem. Biol.* **2013**, *8*, 1460–1468, doi:10.1021/cb400017h.
4. Ishimura, S.; Furuhashi, M.; Mita, T.; Fuseya, T.; Watanabe, Y.; Hoshina, K.; Kokubu, N.; Inoue, K.; Yoshida, H.; Miura, T. Reduction of endoplasmic reticulum stress inhibits neointima formation after vascular injury. *Sci. Rep.* **2014**, *4*, 4–11, doi:10.1038/srep06943.
5. Tardito, S.; Isella, C.; Medico, E.; Marchiò, L.; Bevilacqua, E.; Hatzoglou, M.; Bussolati, O.; Franchi-Gazzola, R. The thioxotriazole copper (II) complex A0 induces endoplasmic reticulum stress and paraptotic death in human cancer cells. *J. Biol. Chem.* **2009**, *284*, 24306–24319, doi:10.1074/jbc.M109.026583.
